# Supplementary material for: Joint theoretical and experimental study on the phosphorescence of 2,2′-bithiophene
Source: Royal Society of Chemistry journal article supplement (doi:10.1039/c3cp55221g), 2014-01-01
Supplement: c3cp55221g.pdf [file c3cp55221g.pdf]

# Joint theoretical and experimental study on the phosphorescence of 2,2'-bithiophene

Marcin Andrzejak<sup>a,1</sup> and Łukasz Orzel<sup>b</sup>

<sup>a</sup> *K. Gumiński department of Theoretical Chemistry, Jagiellonian University*

<sup>b</sup> *Inorganic Chemistry Department, Jagiellonian University*

---

<sup>1</sup> To whom the correspondence should be addressed. Ph. +48 12 6632023, e-mail: [andrzej@chemia.uj.edu.pl](mailto:andrzej@chemia.uj.edu.pl)

Table 1.1S. Ground state Cartesian atomic coordinates [a.u.] for the 2T molecule calculated at the B3LYP/aug-cc-pVDZ level of theory.

|   | x      | y      | Z     |
|---|--------|--------|-------|
| s | -2.291 | 3.519  | 0.000 |
| c | -0.230 | 6.082  | 0.000 |
| c | 2.245  | 5.314  | 0.000 |
| c | 2.509  | 2.632  | 0.000 |
| c | 0.234  | 1.353  | 0.000 |
| c | -0.234 | -1.353 | 0.000 |
| s | 2.291  | -3.519 | 0.000 |
| c | 0.230  | -6.082 | 0.000 |
| c | -2.245 | -5.314 | 0.000 |
| c | -2.509 | -2.632 | 0.000 |
| h | -0.983 | 7.992  | 0.000 |
| h | 3.833  | 6.622  | 0.000 |
| h | 4.330  | 1.673  | 0.000 |
| h | 0.983  | -7.992 | 0.000 |
| h | -3.833 | -6.622 | 0.000 |
| h | -4.330 | -1.673 | 0.000 |

Table 1.2S. Ground state Cartesian atomic coordinates [a.u.] for the 2T molecule calculated at the B3LYP/aug-cc-pVTZ level of theory.

|   | x      | y      | Z     |
|---|--------|--------|-------|
| s | -2.270 | 3.504  | 0.000 |
| c | -0.230 | 6.049  | 0.000 |
| c | 2.230  | 5.287  | 0.000 |
| c | 2.494  | 2.620  | 0.000 |
| c | 0.231  | 1.348  | 0.000 |
| c | -0.231 | -1.348 | 0.000 |
| s | 2.270  | -3.504 | 0.000 |
| c | 0.230  | -6.049 | 0.000 |
| c | -2.230 | -5.287 | 0.000 |
| c | -2.494 | -2.620 | 0.000 |
| h | -0.971 | 7.944  | 0.000 |
| h | 3.807  | 6.582  | 0.000 |
| h | 4.300  | 1.668  | 0.000 |
| h | 0.971  | -7.944 | 0.000 |
| h | -3.807 | -6.582 | 0.000 |
| h | -4.300 | -1.668 | 0.000 |

Table 1.3S. Ground state Cartesian atomic coordinates [a.u.] for the 2T molecule calculated at the B3LYP/aug-cc-pVQZ level of theory.

|   | x      | y      | Z     |
|---|--------|--------|-------|
| s | -2.263 | 3.501  | 0.000 |
| c | -0.231 | 6.044  | 0.000 |
| c | 2.231  | 5.285  | 0.000 |
| c | 2.495  | 2.619  | 0.000 |
| c | 0.230  | 1.348  | 0.000 |
| c | -0.230 | -1.348 | 0.000 |
| s | 2.263  | -3.501 | 0.000 |
| c | 0.231  | -6.044 | 0.000 |
| c | -2.231 | -5.285 | 0.000 |
| c | -2.495 | -2.619 | 0.000 |
| h | -0.973 | 7.937  | 0.000 |
| h | 3.806  | 6.581  | 0.000 |
| h | 4.301  | 1.668  | 0.000 |
| h | 0.973  | -7.937 | 0.000 |
| h | -3.806 | -6.581 | 0.000 |
| h | -4.301 | -1.668 | 0.000 |

Table 2.1S. Ground state Cartesian atomic coordinates [a.u.] for the 2T molecule calculated at the CC2/aug-cc-pVDZ level of theory.

|   | x      | y      | Z     |
|---|--------|--------|-------|
| s | -2.282 | 3.505  | 0.000 |
| c | -0.244 | 6.082  | 0.000 |
| c | 2.274  | 5.322  | 0.000 |
| c | 2.549  | 2.641  | 0.000 |
| c | 0.239  | 1.354  | 0.000 |
| c | -0.239 | -1.354 | 0.000 |
| s | 2.282  | -3.505 | 0.000 |
| c | 0.244  | -6.082 | 0.000 |
| c | -2.274 | -5.322 | 0.000 |
| c | -2.549 | -2.641 | 0.000 |
| h | -1.017 | 7.993  | 0.000 |
| h | 3.850  | 6.655  | 0.000 |
| h | 4.369  | 1.662  | 0.000 |
| h | 1.017  | -7.993 | 0.000 |
| h | -3.850 | -6.655 | 0.000 |
| h | -4.369 | -1.662 | 0.000 |

Table 2.2S. Ground state Cartesian atomic coordinates [a.u.] for the 2T molecule calculated at the CC2/aug-cc-pVTZ level of theory.

|   | x      | y      | Z     |
|---|--------|--------|-------|
| s | -2.252 | 3.474  | 0.000 |
| c | -0.243 | 6.029  | 0.000 |
| c | 2.251  | 5.276  | 0.000 |
| c | 2.525  | 2.620  | 0.000 |
| c | 0.236  | 1.344  | 0.000 |
| c | -0.236 | -1.344 | 0.000 |
| s | 2.252  | -3.474 | 0.000 |
| c | 0.243  | -6.029 | 0.000 |
| c | -2.251 | -5.276 | 0.000 |
| c | -2.525 | -2.620 | 0.000 |
| h | -1.005 | 7.919  | 0.000 |
| h | 3.813  | 6.592  | 0.000 |
| h | 4.325  | 1.648  | 0.000 |
| h | 1.005  | -7.919 | 0.000 |
| h | -3.813 | -6.592 | 0.000 |
| h | -4.325 | -1.648 | 0.000 |

Table 2.3S. Ground state Cartesian atomic coordinates [a.u.] for the 2T molecule calculated at the CC2/aug-cc-pVQZ level of theory.

|   | x      | y      | Z     |
|---|--------|--------|-------|
| s | -2.241 | 3.468  | 0.000 |
| c | -0.244 | 6.015  | 0.000 |
| c | 2.248  | 5.268  | 0.000 |
| c | 2.523  | 2.617  | 0.000 |
| c | 0.235  | 1.344  | 0.000 |
| c | -0.235 | -1.344 | 0.000 |
| s | 2.241  | -3.468 | 0.000 |
| c | 0.244  | -6.015 | 0.000 |
| c | -2.248 | -5.268 | 0.000 |
| c | -2.523 | -2.617 | 0.000 |
| h | -1.005 | 7.904  | 0.000 |
| h | 3.807  | 6.584  | 0.000 |
| h | 4.321  | 1.645  | 0.000 |
| h | 1.005  | -7.904 | 0.000 |
| h | -3.807 | -6.584 | 0.000 |
| h | -4.321 | -1.645 | 0.000 |

Table 3.1S. Ground state Cartesian atomic coordinates [ $\text{\AA}$ ] for the 2T molecule calculated at the CASPT2/aug-cc-pVDZ level of theory.

|   | x      | y      | Z     |
|---|--------|--------|-------|
| S | -1.212 | 1.850  | 0.000 |
| S | 1.212  | -1.850 | 0.000 |
| C | -0.134 | 3.212  | 0.000 |
| C | 0.134  | -3.212 | 0.000 |
| C | -1.193 | -2.817 | 0.000 |
| C | 1.193  | 2.817  | 0.000 |
| C | -1.340 | -1.395 | 0.000 |
| C | 1.340  | 1.395  | 0.000 |
| C | -0.123 | -0.719 | 0.000 |
| C | 0.123  | 0.719  | 0.000 |
| H | -0.543 | 4.222  | 0.000 |
| H | 0.543  | -4.222 | 0.000 |
| H | -2.026 | -3.521 | 0.000 |
| H | 2.026  | 3.521  | 0.000 |
| H | -2.303 | -0.880 | 0.000 |
| H | 2.303  | 0.880  | 0.000 |

Table 3.2S. Ground state Cartesian atomic coordinates [ $\text{\AA}$ ] for the 2T molecule calculated at the CASPT2/aug-cc-pVTZ level of theory.

|   | x      | y      | Z     |
|---|--------|--------|-------|
| S | 1.013  | -1.941 | 0.000 |
| S | -1.013 | 1.941  | 0.000 |
| C | -0.174 | -3.182 | 0.000 |
| C | 0.174  | 3.182  | 0.000 |
| C | -1.445 | -2.666 | 0.000 |
| C | 1.445  | 2.666  | 0.000 |
| C | -1.455 | -1.250 | 0.000 |
| C | 1.455  | 1.250  | 0.000 |
| C | -0.190 | -0.699 | 0.000 |
| C | 0.190  | 0.699  | 0.000 |
| H | 0.131  | -4.216 | 0.000 |
| H | -0.131 | 4.216  | 0.000 |
| H | -2.334 | -3.278 | 0.000 |
| H | 2.334  | 3.278  | 0.000 |
| H | -2.354 | -0.650 | 0.000 |
| H | 2.354  | 0.650  | 0.000 |

Table 4.1S. The lowest triplet state Cartesian atomic coordinates [a.u.] for the 2T molecule calculated at the B3LYP/aug-cc-pVDZ level of theory.

|   | x      | y      | Z     |
|---|--------|--------|-------|
| s | -2.391 | 3.498  | 0.000 |
| c | -0.262 | 6.041  | 0.000 |
| c | 2.271  | 5.249  | 0.000 |
| c | 2.577  | 2.653  | 0.000 |
| c | 0.198  | 1.276  | 0.000 |
| c | -0.198 | -1.276 | 0.000 |
| s | 2.391  | -3.498 | 0.000 |
| c | 0.262  | -6.041 | 0.000 |
| c | -2.271 | -5.249 | 0.000 |
| c | -2.577 | -2.653 | 0.000 |
| h | -0.976 | 7.966  | 0.000 |
| h | 3.836  | 6.586  | 0.000 |
| h | 4.393  | 1.689  | 0.000 |
| h | 0.976  | -7.966 | 0.000 |
| h | -3.836 | -6.586 | 0.000 |
| h | -4.393 | -1.689 | 0.000 |

Table 4.2S. The lowest triplet state Cartesian atomic coordinates [a.u.] for the 2T molecule calculated at the B3LYP/aug-cc-pVTZ level of theory.

|   | x      | y      | Z     |
|---|--------|--------|-------|
| s | -2.373 | 3.481  | 0.000 |
| c | -0.263 | 6.006  | 0.000 |
| c | 2.256  | 5.220  | 0.000 |
| c | 2.563  | 2.640  | 0.000 |
| c | 0.195  | 1.268  | 0.000 |
| c | -0.195 | -1.268 | 0.000 |
| s | 2.373  | -3.481 | 0.000 |
| c | 0.263  | -6.006 | 0.000 |
| c | -2.256 | -5.220 | 0.000 |
| c | -2.563 | -2.640 | 0.000 |
| h | -0.965 | 7.916  | 0.000 |
| h | 3.809  | 6.546  | 0.000 |
| h | 4.364  | 1.684  | 0.000 |
| h | 0.965  | -7.916 | 0.000 |
| h | -3.809 | -6.546 | 0.000 |
| h | -4.364 | -1.684 | 0.000 |

Table 4.3S. The lowest triplet state Cartesian atomic coordinates [a.u.] for the 2T molecule calculated at the B3LYP/aug-cc-pVQZ level of theory.

|   | x      | y      | Z     |
|---|--------|--------|-------|
| s | -2.367 | 3.478  | 0.000 |
| c | -0.264 | 6.000  | 0.000 |
| c | 2.257  | 5.217  | 0.000 |
| c | 2.564  | 2.639  | 0.000 |
| c | 0.194  | 1.269  | 0.000 |
| c | -0.194 | -1.269 | 0.000 |
| s | 2.367  | -3.478 | 0.000 |
| c | 0.264  | -6.000 | 0.000 |
| c | -2.257 | -5.217 | 0.000 |
| c | -2.564 | -2.639 | 0.000 |
| h | -0.967 | 7.908  | 0.000 |
| h | 3.807  | 6.545  | 0.000 |
| h | 4.364  | 1.682  | 0.000 |
| h | 0.967  | -7.908 | 0.000 |
| h | -3.807 | -6.545 | 0.000 |
| h | -4.364 | -1.682 | 0.000 |

Table 5.1S. The lowest triplet state Cartesian atomic coordinates [a.u.] for the 2T molecule calculated at the CC2/aug-cc-pVDZ level of theory.

|   | x      | y      | Z     |
|---|--------|--------|-------|
| s | -2.386 | 3.482  | 0.000 |
| c | -0.275 | 6.041  | 0.000 |
| c | 2.296  | 5.259  | 0.000 |
| c | 2.612  | 2.654  | 0.000 |
| c | 0.204  | 1.283  | 0.000 |
| c | -0.204 | -1.283 | 0.000 |
| s | 2.386  | -3.482 | 0.000 |
| c | 0.275  | -6.041 | 0.000 |
| c | -2.296 | -5.259 | 0.000 |
| c | -2.612 | -2.654 | 0.000 |
| h | -1.008 | 7.969  | 0.000 |
| h | 3.850  | 6.620  | 0.000 |
| h | 4.427  | 1.667  | 0.000 |
| h | 1.008  | -7.969 | 0.000 |
| h | -3.850 | -6.620 | 0.000 |
| h | -4.427 | -1.667 | 0.000 |

Table 5.2S. The lowest triplet state Cartesian atomic coordinates [a.u.] for the 2T molecule calculated at the CC2/aug-cc-pVTZ level of theory.

|   | x      | y      | Z     |
|---|--------|--------|-------|
| s | -2.360 | 3.448  | 0.000 |
| c | -0.276 | 5.983  | 0.000 |
| c | 2.274  | 5.210  | 0.000 |
| c | 2.589  | 2.631  | 0.000 |
| c | 0.201  | 1.271  | 0.000 |
| c | -0.201 | -1.271 | 0.000 |
| s | 2.360  | -3.448 | 0.000 |
| c | 0.276  | -5.983 | 0.000 |
| c | -2.274 | -5.210 | 0.000 |
| c | -2.589 | -2.631 | 0.000 |
| h | -0.996 | 7.890  | 0.000 |
| h | 3.812  | 6.555  | 0.000 |
| h | 4.383  | 1.651  | 0.000 |
| h | 0.996  | -7.890 | 0.000 |
| h | -3.812 | -6.555 | 0.000 |
| h | -4.383 | -1.651 | 0.000 |

Table 5.3S. The lowest triplet state Cartesian atomic coordinates [a.u.] for the 2T molecule calculated at the CC2/aug-cc-pVQZ level of theory.

|   | x      | y      | Z     |
|---|--------|--------|-------|
| s | -2.349 | 3.441  | 0.000 |
| c | -0.277 | 5.968  | 0.000 |
| c | 2.271  | 5.201  | 0.000 |
| c | 2.587  | 2.626  | 0.000 |
| c | 0.200  | 1.270  | 0.000 |
| c | -0.200 | -1.270 | 0.000 |
| s | 2.349  | -3.441 | 0.000 |
| c | 0.277  | -5.968 | 0.000 |
| c | -2.271 | -5.201 | 0.000 |
| c | -2.587 | -2.626 | 0.000 |
| h | -0.996 | 7.874  | 0.000 |
| h | 3.806  | 6.547  | 0.000 |
| h | 4.379  | 1.648  | 0.000 |
| h | 0.996  | -7.874 | 0.000 |
| h | -3.806 | -6.547 | 0.000 |
| h | -4.379 | -1.648 | 0.000 |



Table 6.1S. The lowest triplet state Cartesian atomic coordinates [ $\text{\AA}$ ] for the 2T molecule calculated at the CASPT2/aug-cc-pVDZ level of theory.

|   | x      | y      | Z     |
|---|--------|--------|-------|
| S | -1.258 | 1.840  | 0.000 |
| S | 1.258  | -1.840 | 0.000 |
| C | -0.141 | 3.191  | 0.000 |
| C | 0.141  | -3.191 | 0.000 |
| C | 1.212  | 2.780  | 0.000 |
| C | -1.212 | -2.780 | 0.000 |
| C | 1.374  | 1.399  | 0.000 |
| C | -1.374 | -1.399 | 0.000 |
| C | 0.106  | 0.683  | 0.000 |
| C | -0.106 | -0.683 | 0.000 |
| H | -0.527 | 4.210  | 0.000 |
| H | 0.527  | -4.210 | 0.000 |
| H | 2.037  | 3.495  | 0.000 |
| H | -2.037 | -3.495 | 0.000 |
| H | 2.334  | 0.879  | 0.000 |
| H | -2.334 | -0.879 | 0.000 |

Table 6.2S. The lowest triplet state Cartesian atomic coordinates [ $\text{\AA}$ ] for the 2T molecule calculated at the CASPT2/aug-cc-pVTZ level of theory.

|   | x      | y      | Z     |
|---|--------|--------|-------|
| S | -1.187 | -1.862 | 0.000 |
| S | 1.187  | 1.862  | 0.000 |
| C | 0.126  | -0.673 | 0.000 |
| C | -0.126 | 0.673  | 0.000 |
| C | 1.406  | -1.344 | 0.000 |
| C | -1.406 | 1.344  | 0.000 |
| C | 1.287  | -2.716 | 0.000 |
| C | -1.287 | 2.716  | 0.000 |
| C | -0.042 | -3.164 | 0.000 |
| C | 0.042  | 3.164  | 0.000 |
| H | 2.338  | -0.799 | 0.000 |
| H | -2.338 | 0.799  | 0.000 |
| H | 2.125  | -3.397 | 0.000 |
| H | -2.125 | 3.397  | 0.000 |
| H | -0.390 | -4.184 | 0.000 |
| H | 0.390  | 4.184  | 0.000 |

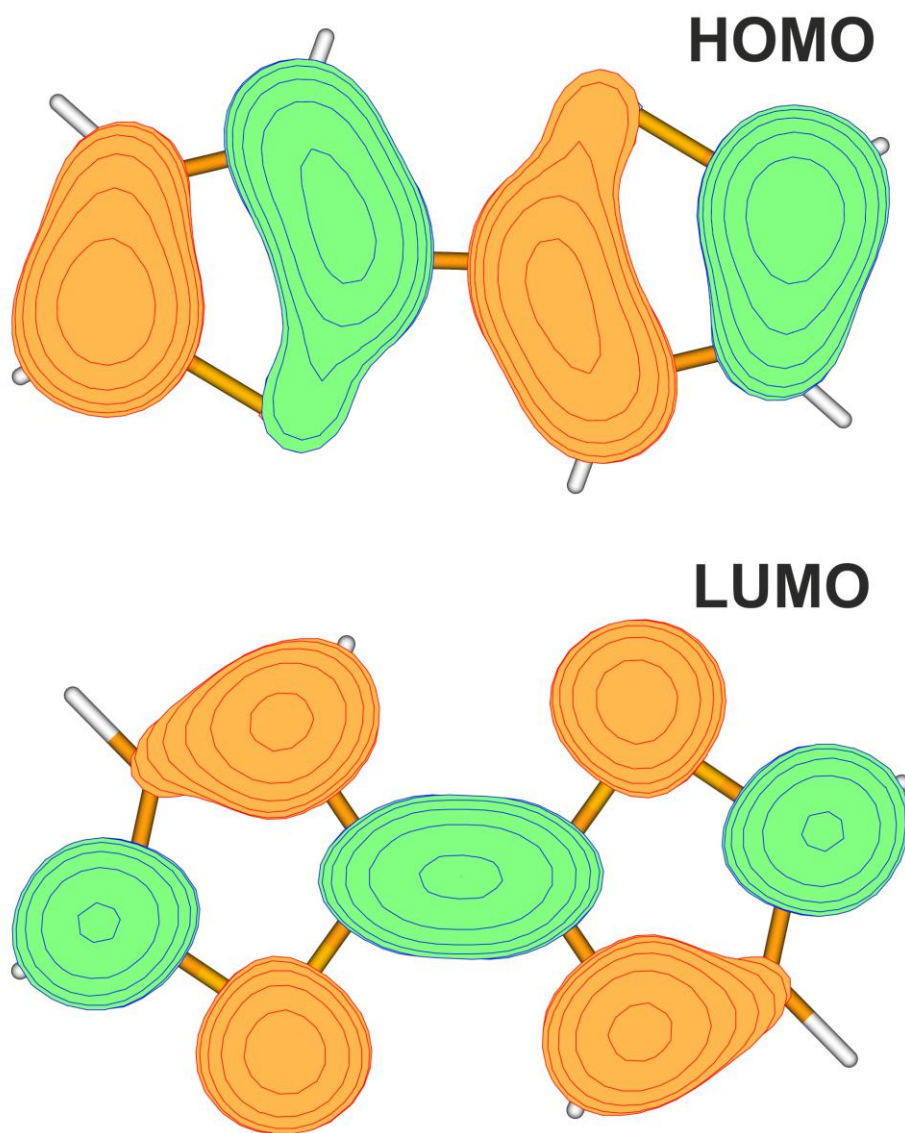

Fig1S. Frontier orbitals of 2T

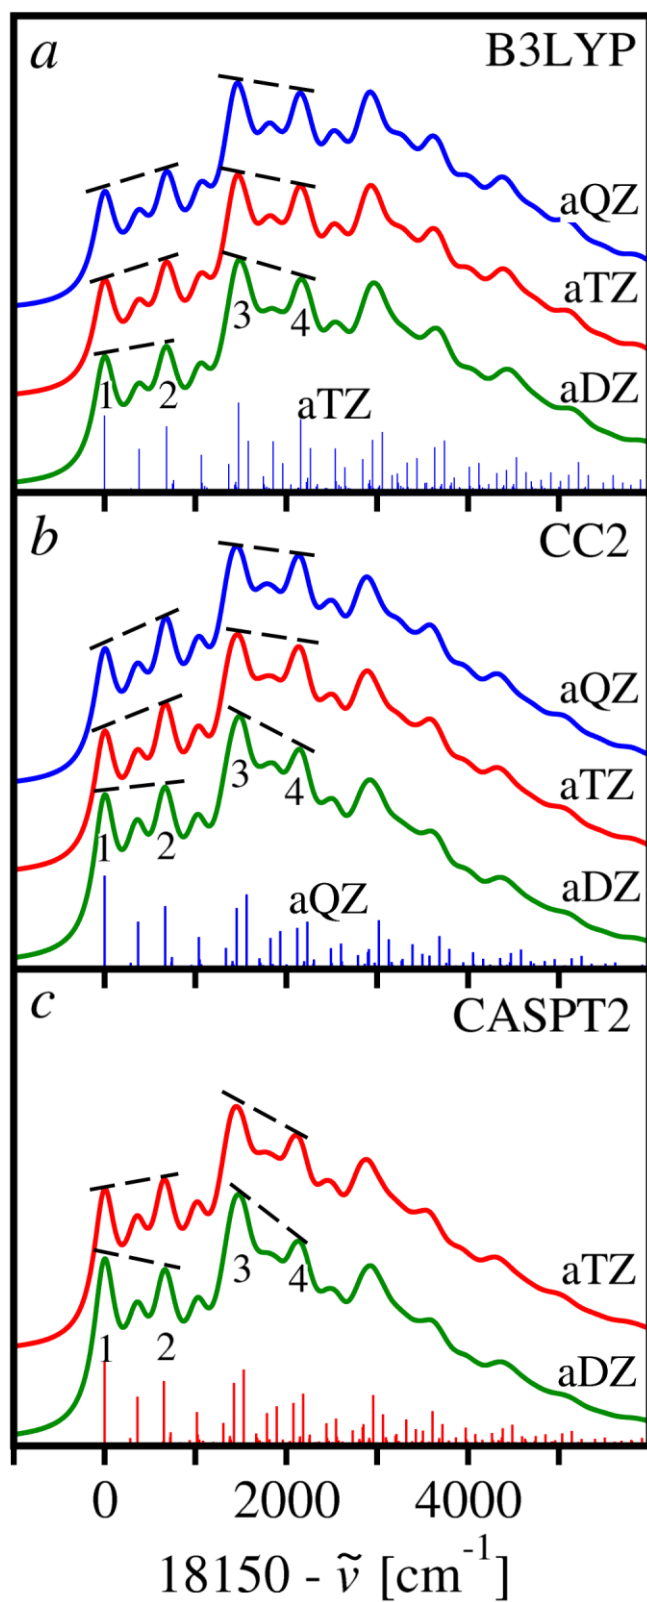

Fig.2S Basis set influence on the theoretical spectra based on the results of the selected quantum chemistry methods.

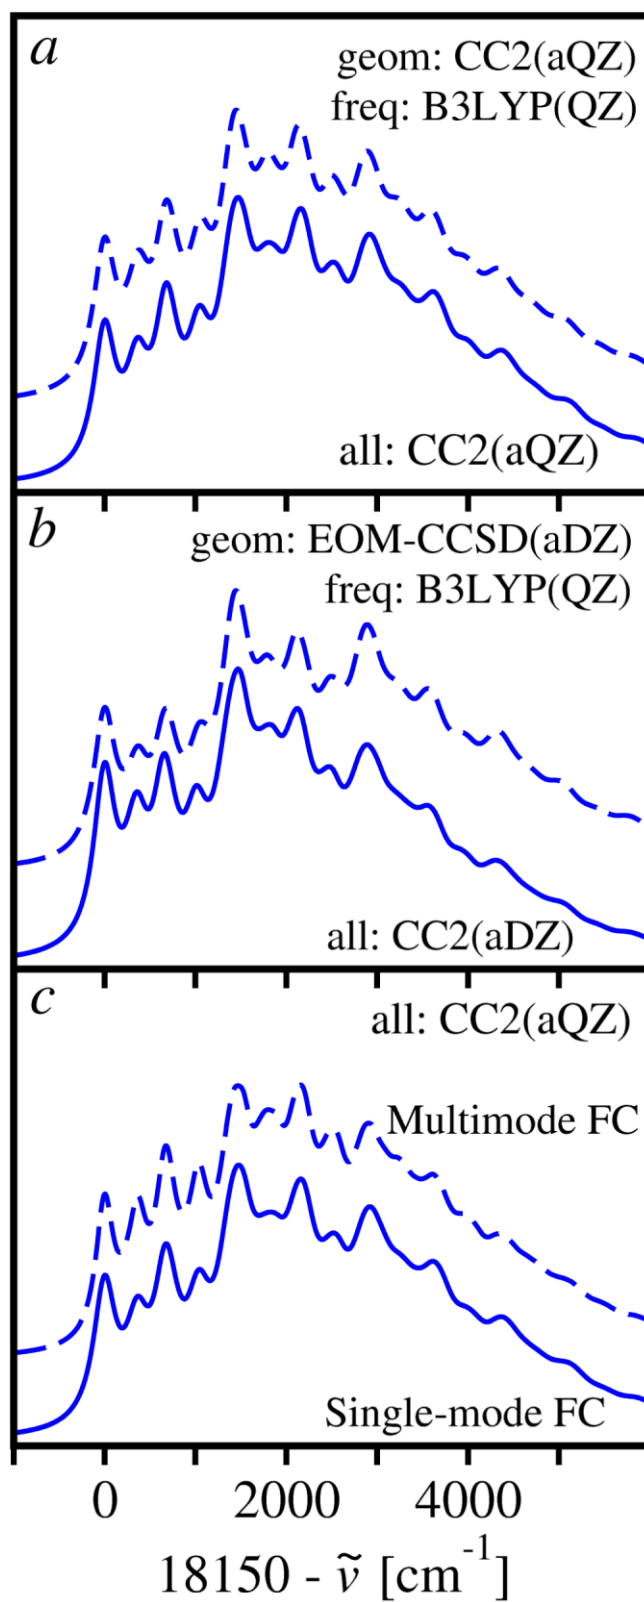

Fig.3S. Effects of various approximations used in the theoretical modeling of the phosphorescence spectrum of 2T.
